# Supplementary material for: Development and Application of a Pragmatic Algorithm to Guide Definitive Carbapenemase Testing to Identify Carbapenemase-Producing Pseudomonas aeruginosa
Source: Antibiotics (Basel). 2020 Oct 27;9(11):738. doi: 10.3390/antibiotics9110738 (PMC7693613; doi:10.3390/antibiotics9110738)
Supplement: Supplementary file 1 [file antibiotics-09-00738-s001.xlsx]

## Sheet: Sheet1
Tble S1 P.aeruginosa Challenge Set
Species	Study #	Source	Genotype
PSA	1	Clinical	VIM-4, GES-5, OXA-50
PSA	2	Clinical	VEB-2; VIM-2;
PSA	3	CDC #863	VIM-2, OXA-395
PSA	4	CDC #110	VIM-2,OXA-50,PAO
PSA	5	CDC #444	VIM-2, OXA-4
PSA	6	CDC #255	VIM-2,OXA-4,OXA-50,PAO
PSA	7	Clinical	VIM-2
PSA	8	Clinical	VIM-2;
PSA	9	Clinical	VIM-4;
PSA	10	CDC #254	VIM-2,OXA-4,OXA-50,PAO
PSA	11	CDC #250	NDM-1,OXA-10,OXA-50,PAO,VEB-1
PSA	12	Clinical	NDM-1, OXA-50, OXA-10, VEB-1
PSA	13	Clinical	NDM-1, OXA-50, OXA-10, VEB-1
PSA	14	CDC #246	NDM-1,OXA-10,OXA-50,PAO,VEB-1
PSA	15	Clinical	NDM-1, PDC-35
PSA	16	Clinical	NDM-1;
PSA	17	Clinical	NDM-1, OXA-50, OXA-10, VEB-1
PSA	18	Clinical	NDM-1, OXA-50, OXA-10, VEB-1
PSA	19	Clinical	NDM-1, OXA-488, PME-1, AER-1
PSA	20	Clinical	NDM-1, DIM-1
PSA	21	Clinical	IMP-43
PSA	22	Clinical	IMP-1
PSA	23	CDC #103	IMP-1, OXA-50, PAO
PSA	24	Clinical	IMP-48;
PSA	25	CDC #241	IMP-1, OXA-101, OXA-50, OXA-9 PAO
PSA	26	Clinical	IMP-1
PSA	27	Clinical	IMP-1
PSA	28	Clinical	IMP-1
PSA	29	Clinical	IMP-48;
PSA	30	Clinical	IMP-6;
PSA	31	CDC #441	KPC-2
PSA	32	CDC #356	KPC-2,PDC-42
PSA	33	CDC #516	KPC-2,PDC-101
PSA	34	CDC #518	KPC-2,PDC-103
PSA	35	CDC #090	KPC-5,OXA-50,PAO
PSA	36	CDC #231	KPC-5,OXA-2,OXA-50,PAO
PSA	37	Clinical	KPC-2
PSA	38	Clinical	KPC-2
PSA	39	CDC #765	GES-19, GES-20
PSA	40	CDC #768	GES-19, GES-20
PSA	41	CDC #770	GES-19, GES-26
PSA	42	CDC #771	GES-19, GES-20
PSA	43	CDC #764	GES-19, GES-20
PSA	44	CDC #769	GES-19, GES-26
PSA	45	CDC #763	GES-19, GES-20
PSA	46	CDC #767	GES-20
PSA	47	CDC #772	GES-20, GES-26
PSA	48	Clinical	SPM-1;
PSA	49	Clinical	SPM-1
PSA	50	Clinical	SPM-1
PSA	51	Clinical	SPM-1
PSA	52	Clinical	SPM-1
PSA	53	Clinical	SPM-1
PSA	54	Clinical	SPM-1
PSA	55	Clinical	SPM-1
PSA	56	Clinical	SPM-1
PSA	57	CDC #0064	SPM-1,OXA-50,OXA-56,PAO
PSA	58	Clinical
PSA	59	Clinical
PSA	60	Clinical
PSA	61	Clinical
PSA	62	Clinical
PSA	63	Clinical
PSA	64	Clinical
PSA	65	Clinical
PSA	66	Clinical
PSA	67	Clinical
PSA	68	Clinical
PSA	69	Clinical
PSA	70	Clinical
PSA	71	Clinical
PSA	72	Clinical
PSA	73	CDC #508	PDC-35, PER-1
PSA	74	CDC #510	PDC-112
PSA	75	CDC #511	PDC-8
PSA	76	CDC #512	PDC-16
PSA	77	CDC #513	PDC-35
PSA	78	CDC #514	PDC-37
PSA	79	CDC #515	FOX-14, PDC-1
PSA	80	CDC #526	PDC-19
PSA	81	CDC #527	PDC-35
PSA	82	CDC #528	PDC-1
PSA	83	Clinical	mexT/ mexR
PSA	84	Clinical	oprD/mexT/malC
PSA	85	Clinical	mexT
PSA	86	Clinical	oprD/mexT
PSA	87	Clinical	mexT/PA2019/PA2020
PSA	88	Clinical	oprD/mexT
PSA	89	Clinical	mexT
PSA	90	Clinical	PA2020/PA2213
PSA	91	Clinical	oprD/mexT/PA4179/PA5160
PSA	92	Clinical	mext/PA3038
